# Supplementary material
Source: HighWire-hosted journal article supplement (https://mct.aacrjournals.org/content/suppl/2017/08/22/1535-7163.MCT-16-0807)
Supplement: 175281_3_supp_4171526_4tgq64.pdf [file 175281_3_supp_4171526_4tgq64.pdf]

**FN**

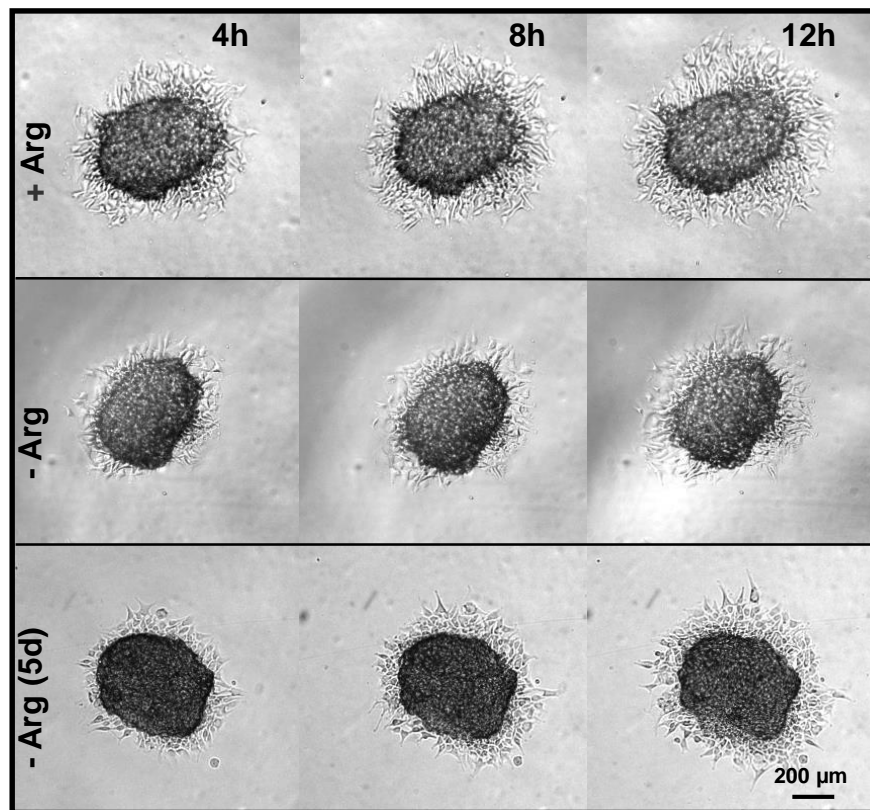

**Col-I**

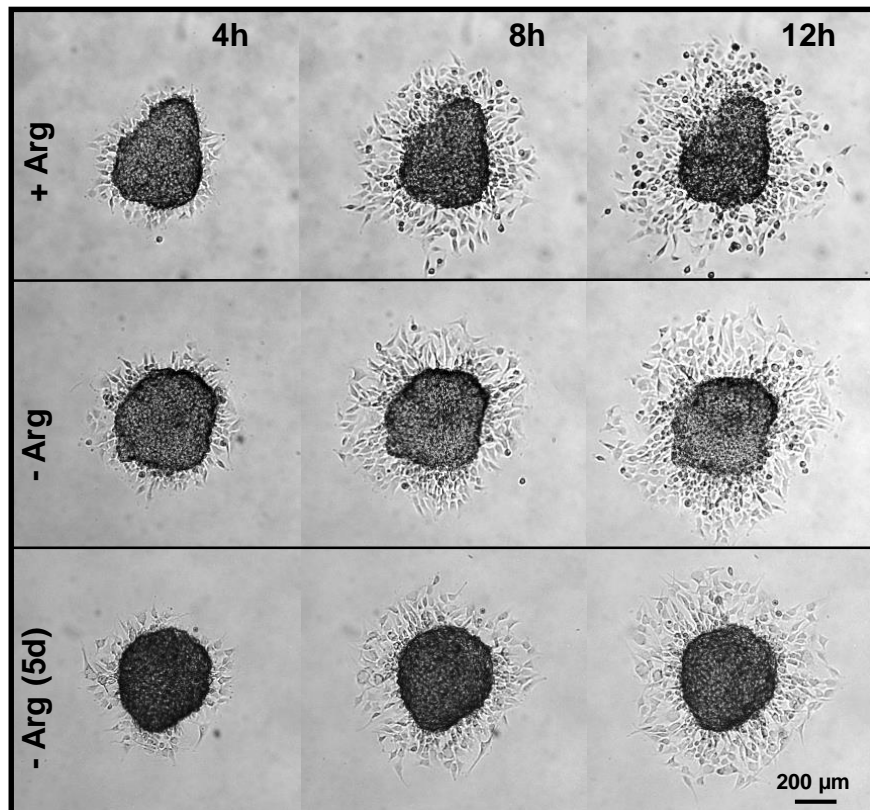

## Supplemental Figure 5

**ADT barely affects migratory activity of GBM spheroid cells on fibronectin (FN) and collagen type-I (Col-I) surfaces.**

Representative microscopic images of U87-MG-shp53 spheroids 4, 8 and 12 h after spheroid transfer onto plane ECM-coated surfaces. Spheroid cell motility was studied under standard culture conditions (+ Arg), under acute ADT (- Arg) and under chronic arginine deficiency with a pre-exposure to ADT for 5 d (- Arg (5d)).
